# Supplementary material for: Profiling of triacylglycerol composition in the breast milk of Chinese mothers at different lactation stages
Source: Royal Society of Chemistry journal article supplement (doi:10.1039/d2fo01877b), 2022-01-01
Supplement: d2fo01877b1.xlsx [file d2fo01877b1.xlsx]

## Sheet: Sheet1
Appendix Table A. TAG with Specific FA Chain and Composition in Chinese Human Milk (%)
Compound	Composition	M+NH4	Abbreviation	Colostrum				Transition Milk				Postnatal 40-45 days				Postnatal 200-240 days				Postnatal 300-400 days
				n=53				n=59				n=60				n=65				n=60
				Mean	SE	Range		Mean	SE	Range		Mean	SE	Range		Mean	SE	Range		Mean	SE	Range
TAG 34:0	C8:0_C12:0_C14:0	628.555	Cy_La_M	0.001	0.001	0	0.026	0.044	0.005	0	0.163	0.017	0.003	0	0.101	0.016	0.002	0	0.102	0.012	0.002	0	0.055
TAG 34:0	C10:0_C10:0_C14:0	628.555	Ca_Ca_M	0	0	0	0.016	0.029	0.003	0	0.108	0.01	0.002	0	0.058	0.009	0.001	0	0.059	0.007	0.001	0	0.032
TAG 36:0	C10:0_C12:0_C14:0	656.585	Ca_La_M	0.004	0.002	0	0.066	0.125	0.011	0	0.36	0.069	0.008	0	0.253	0.082	0.007	0	0.237	0.056	0.005	0	0.169
TAG 36:0	C12:0_C12:0_C12:0	656.585	La_La_La	0.003	0.001	0	0.04	0.126	0.011	0	0.362	0.039	0.004	0	0.142	0.046	0.004	0	0.133	0.031	0.003	0	0.095
TAG 36:0	C8:0_C12:0_C16:0	656.585	Cy_La_P	0.001	0.001	0	0.018	ND	ND	ND	ND	ND	ND	ND	ND	ND	ND	ND	ND	ND	ND	ND	ND
TAG 36:0	C10:0_C10:0_C16:0	656.585	Ca_Ca_P	0.001	0	0	0.01	ND	ND	ND	ND	ND	ND	ND	ND	ND	ND	ND	ND	ND	ND	ND	ND
TAG 36:0	C8:0_C14:0_C14:0	656.585	Cy_M_M	0.001	0	0	0.009	ND	ND	ND	ND	ND	ND	ND	ND	ND	ND	ND	ND	ND	ND	ND	ND
TAG 36:1	C6:0_C12:0_C18:1	654.572	Co_La_O	ND	ND	ND	ND	ND	ND	ND	ND	0.002	0.001	0	0.022	0.005	0.001	0	0.036	0.003	0.001	0	0.02
TAG 36:1	C8:0_C10:0_C18:1	654.572	Cy_Ca_O	ND	ND	ND	ND	ND	ND	ND	ND	0.002	0.001	0	0.019	0.004	0.001	0	0.031	0.002	0.001	0	0.017
TAG 38:0	C10:0_C12:0_C16:0	684.621	Ca_La_P	0.007	0.002	0	0.076	0.118	0.01	0	0.391	0.07	0.008	0	0.296	0.091	0.007	0.008	0.343	0.076	0.005	0	0.228
TAG 38:0	C10:0_C14:0_C14:0	684.621	Ca_M_M	0.007	0.002	0	0.074	0.073	0.006	0	0.241	0.051	0.006	0	0.217	0.067	0.005	0.006	0.251	0.056	0.004	0	0.167
TAG 38:0	C12:0_C12:0_C14:0	684.621	La_La_M	0.022	0.007	0	0.23	0.331	0.029	0	1.092	0.111	0.012	0	0.467	0.144	0.011	0.013	0.54	0.12	0.008	0	0.359
TAG 38:1	C8:0_C12:0_C18:1	682.602	Cy_La_O	0.001	0.001	0	0.034	0.035	0.003	0	0.091	0.021	0.002	0	0.066	0.023	0.003	0	0.109	0.013	0.002	0	0.052
TAG 38:1	C10:0_C10:0_C18:1	682.602	Ca_Ca_O	0.001	0.001	0	0.029	0.016	0.001	0	0.041	0.013	0.001	0	0.04	0.014	0.002	0	0.066	0.008	0.001	0	0.031
TAG 38:1	C10:0_C12:0_C16:1	682.602	Ca_La_Po	0.001	0.001	0	0.027	0.017	0.001	0	0.044	0.023	0.003	0	0.071	0.024	0.003	0	0.118	0.014	0.002	0	0.056
TAG 38:1	C4:0_C16:0_C18:1	682.602	Bu_P_O	0.004	0.002	0	0.087	0.015	0.002	0	0.055	0.096	0.011	0	0.464	0.091	0.008	0	0.226	0.056	0.006	0	0.154
TAG 38:2	C10:0_C10:0_C18:2	680.585	Ca_Ca_L	0	0	0	0.006	0.005	0.002	0	0.056	0.006	0.001	0	0.042	0.01	0.002	0	0.093	0.005	0.001	0	0.025
TAG 38:2	C8:0_C12:0_C18:2	680.585	Cy_La_L	0	0	0	0.006	ND	ND	ND	ND	0.01	0.002	0	0.068	0.016	0.003	0	0.151	0.008	0.002	0	0.04
TAG 38:2	C6:0_C14:0_C18:2	680.585	Co_M_L	ND	ND	ND	ND	ND	ND	ND	ND	0.007	0.001	0	0.026	0.019	0.002	0	0.045	0.011	0.001	0	0.031
TAG 38:2	C4:0_C16:0_C18:2	680.585	Bu_P_L	ND	ND	ND	ND	ND	ND	ND	ND	0.009	0.001	0	0.032	0.023	0.002	0	0.056	0.013	0.002	0	0.038
TAG 40:0	C12:0_C12:0_C16:0	712.65	La_La_P	0.098	0.023	0	0.808	0.18	0.015	0.016	0.586	0.107	0.011	0.015	0.478	0.156	0.013	0.025	0.643	0.144	0.011	0	0.475
TAG 40:0	C10:0_C14:0_C16:0	712.65	Ca_M_P	ND	ND	ND	ND	0.203	0.017	0.018	0.66	0.081	0.008	0.011	0.365	0.119	0.01	0.019	0.49	0.11	0.008	0	0.363
TAG 40:0	C12:0_C14:0_C14:0	712.65	La_M_M	ND	ND	ND	ND	0.401	0.034	0.035	1.307	0.126	0.013	0.018	0.566	0.184	0.015	0.03	0.76	0.17	0.013	0	0.562
TAG 40:0	C10:0_C12:0_C18:0	712.65	Ca_La_S	ND	ND	ND	ND	ND	ND	ND	ND	0.059	0.006	0.008	0.265	0.086	0.007	0.014	0.356	0.08	0.006	0	0.263
TAG 40:1	C10:0_C12:0_C18:1	710.634	Ca_La_O	0.032	0.011	0	0.457	0.443	0.021	0	0.916	0.376	0.025	0.033	0.815	0.385	0.026	0.069	0.934	0.269	0.02	0	0.668
TAG 40:1	C12:0_C12:0_C16:1	710.634	La_La_Po	0.004	0.001	0	0.052	0.057	0.003	0	0.118	0.023	0.002	0.002	0.051	0.024	0.002	0.004	0.058	0.017	0.001	0	0.042
TAG 40:2	C10:0_C12:0_C18:2	708.616	Ca_La_L	0.01	0.005	0	0.263	0.209	0.012	0	0.45	0.135	0.014	0	0.371	0.164	0.013	0.022	0.596	0.104	0.008	0	0.274
TAG 40:3	C4:0_C18:1_C18:2	706.603	Bu_O_L	0.001	0.001	0	0.038	0.007	0.002	0	0.083	0.029	0.005	0	0.162	0.041	0.004	0	0.123	0.02	0.003	0	0.084
TAG 42:0	C12:0_C14:0_C16:0	740.681	La_M_P	0.111	0.02	0	0.591	0.505	0.038	0.083	1.619	0.362	0.034	0.078	1.523	0.539	0.045	0.104	2.137	0.574	0.042	0	1.848
TAG 42:0	C14:0_C14:0_C14:0	740.681	M_M_M	0.07	0.013	0	0.372	0.397	0.03	0.065	1.274	0.141	0.013	0.03	0.595	0.21	0.017	0.04	0.834	0.224	0.016	0	0.721
TAG 42:1	C12:0_C12:0_C18:1	738.661	La_La_O	0.191	0.042	0	1.64	0.169	0.009	0.017	0.341	0.282	0.019	0.046	0.651	0.316	0.018	0.097	0.697	0.265	0.018	0	0.666
TAG 42:1	C10:0_C14:0_C18:1	738.661	Ca_M_O	ND	ND	ND	ND	1.227	0.063	0.121	2.479	0.226	0.015	0.037	0.522	0.254	0.015	0.078	0.559	0.212	0.015	0	0.534
TAG 42:1	C8:0_C16:0_C18:1	738.661	Cy_P_O	ND	ND	ND	ND	ND	ND	ND	ND	0.437	0.029	0.071	1.01	0.491	0.029	0.15	1.081	0.411	0.028	0	1.033
TAG 42:2	C12:0_C12:0_C18:2	736.652	La_La_L	0.061	0.02	0	0.87	0.335	0.018	0.017	0.78	0.206	0.014	0.02	0.627	0.263	0.017	0.069	0.701	0.194	0.014	0	0.565
TAG 42:2	C10:0_C14:0_C18:2	736.652	Ca_M_L	ND	ND	ND	ND	0.147	0.008	0.008	0.343	0.117	0.008	0.011	0.355	0.149	0.009	0.039	0.397	0.11	0.008	0	0.32
TAG 42:2	C8:0_C16:0_C18:2	736.652	Cy_P_L	ND	ND	ND	ND	0.124	0.007	0.006	0.288	0.115	0.008	0.011	0.351	0.148	0.009	0.038	0.393	0.109	0.008	0	0.317
TAG 42:3	C12:0_C12:0_C18:3	734.64	La_La_Ln	0.002	0.001	0	0.077	0.015	0.002	0	0.069	0.016	0.002	0	0.086	0.022	0.002	0	0.063	0.012	0.002	0	0.041
TAG 42:3	C10:0_C14:0_C18:3	734.64	Ca_M_Ln	ND	ND	ND	ND	0.013	0.002	0	0.06	0.003	0	0	0.016	0.004	0	0	0.012	0.002	0	0	0.008
TAG 42:3	C6:0_C18:1_C18:2	734.64	Co_O_L	ND	ND	ND	ND	ND	ND	ND	ND	0.022	0.003	0	0.115	0.03	0.003	0	0.084	0.016	0.002	0	0.055
TAG 44:0	C10:0_C16:0_C18:0	768.71	Ca_P_S	0.055	0.007	0	0.198	0.198	0.013	0.056	0.537	0.202	0.017	0.037	0.726	0.292	0.022	0.067	1.053	0.336	0.022	0	0.891
TAG 44:0	C12:0_C14:0_C18:0	768.71	La_M_S	0.087	0.011	0	0.313	0.249	0.016	0.07	0.675	0.174	0.014	0.032	0.625	0.252	0.019	0.057	0.906	0.289	0.019	0	0.766
TAG 44:0	C12:0_C16:0_C16:0	768.71	La_P_P	0.105	0.013	0	0.379	0.279	0.018	0.078	0.756	0.193	0.016	0.035	0.691	0.278	0.021	0.063	1.002	0.32	0.021	0	0.848
TAG 44:0	C14:0_C14:0_C16:0	768.71	M_M_P	0.096	0.012	0	0.347	0.244	0.016	0.068	0.66	0.073	0.006	0.013	0.26	0.105	0.008	0.024	0.377	0.12	0.008	0	0.319
TAG 44:1	C10:0_C16:0_C18:1	766.687	Ca_P_O	0.283	0.039	0	1.242	0.909	0.035	0.201	1.596	1.198	0.065	0.35	2.501	1.403	0.056	0.554	2.598	1.345	0.061	0	2.428
TAG 44:1	C12:0_C14:0_C18:1	766.687	La_M_O	0.363	0.05	0	1.589	1.928	0.075	0.427	3.384	0.947	0.051	0.277	1.977	1.109	0.044	0.438	2.054	1.063	0.049	0	1.919
TAG 44:2	C10:0_C16:0_C18:2	764.677	Ca_P_L	0.112	0.023	0	0.978	0.456	0.021	0.094	0.964	0.53	0.028	0.13	1.165	0.694	0.035	0.265	1.772	0.596	0.036	0	1.379
TAG 44:2	C12:0_C14:0_C18:2	764.677	La_M_L	0.107	0.022	0	0.928	0.838	0.039	0.173	1.773	0.447	0.024	0.11	0.984	0.586	0.029	0.223	1.496	0.503	0.03	0	1.165
TAG 44:3	C8:0_C18:1_C18:2	762.663	Cy_O_L	0.006	0.005	0	0.244	0.094	0.012	0	0.318	0.103	0.01	0	0.318	0.114	0.011	0	0.614	0.081	0.008	0	0.215
TAG 44:4	C8:0_C18:2_C18:2	760.65	Cy_L_L	ND	ND	ND	ND	ND	ND	ND	ND	0.006	0.002	0	0.079	0.008	0.003	0	0.174	0.002	0.001	0	0.027
TAG 46:0	C12:0_C16:0_C18:0	796.742	La_P_S	0.222	0.022	0	0.669	0.371	0.023	0.105	1.005	0.842	0.094	0.074	3.104	0.538	0.04	0.115	1.83	0.669	0.044	0	1.981
TAG 46:0	C14:0_C14:0_C18:0	796.742	M_M_S	0.09	0.009	0	0.272	0.176	0.011	0.05	0.476	0.331	0.037	0.029	1.219	0.211	0.016	0.045	0.718	0.263	0.017	0	0.778
TAG 46:0	C14:0_C16:0_C16:0	796.742	M_P_P	0.151	0.015	0	0.453	0.22	0.014	0.062	0.595	0.124	0.014	0.011	0.458	0.079	0.006	0.017	0.27	0.099	0.007	0	0.292
TAG 46:1	C12:0_C16:0_C18:1	794.729	La_P_O	1.322	0.113	0	3.573	3.564	0.126	0.995	5.755	2.979	0.158	0.981	6.28	3.737	0.124	1.449	6.374	4.063	0.145	0	5.977
TAG 46:1	C14:0_C14:0_C18:1	794.729	M_M_O	0.565	0.048	0	1.526	0.71	0.025	0.198	1.146	0.217	0.012	0.072	0.458	0.273	0.009	0.106	0.465	0.296	0.011	0	0.436
TAG 46:2	C12:0_C16:1_C18:1	792.72	La_Po_O	0.792	0.095	0	3.615	1.229	0.044	0.301	1.909	1.085	0.051	0.338	1.838	1.446	0.049	0.62	2.598	1.389	0.059	0	2.576
TAG 46:2	C10:0_C18:1_C18:1	792.72	Ca_O_O	ND	ND	ND	ND	1.227	0.044	0.3	1.906	0.948	0.044	0.295	1.606	1.264	0.043	0.542	2.27	1.214	0.051	0	2.251
TAG 46:2	C14:0_C16:1_C16:1	792.72	M_Po_Po	ND	ND	ND	ND	0.172	0.006	0.042	0.267	ND	ND	ND	ND	ND	ND	ND	ND	ND	ND	ND	ND
TAG 46:3	C10:0_C18:1_C18:2	790.694	Ca_O_L	0.087	0.024	0	1.071	0.653	0.035	0.169	1.571	0.593	0.033	0.145	1.408	0.641	0.033	0.25	2.076	0.482	0.025	0	1.117
TAG 46:3	C12:0_C16:0_C18:3	790.694	La_P_Ln	0.003	0.001	0	0.049	0.042	0.006	0	0.151	0.088	0.005	0.021	0.208	0.095	0.005	0.037	0.307	0.071	0.004	0	0.165
TAG 46:4	C10:0_C18:2_C18:2	788.678	Ca_L_L	0.008	0.005	0	0.25	0.14	0.011	0	0.465	0.169	0.018	0.021	0.788	0.189	0.015	0.021	0.914	0.116	0.009	0	0.277
TAG 46:5	C10:0_C18:2_C18:3	786.661	Ca_L_Ln	0	0	0	0.015	0.002	0.001	0	0.054	0.006	0.003	0	0.125	0.003	0.001	0	0.055	0.002	0.001	0	0.03
TAG 48:0	C14:0_C16:0_C18:0	824.774	M_P_S	0.306	0.039	0	2.062	0.365	0.02	0.065	0.883	0.163	0.011	0.013	0.384	0.22	0.016	0.05	0.757	0.315	0.022	0	1.211
TAG 48:0	C16:0_C16:0_C16:0	824.774	P_P_P	0.349	0.044	0	2.345	0.039	0.002	0.007	0.094	0.163	0.011	0.013	0.384	0.22	0.016	0.05	0.757	0.315	0.022	0	1.211
TAG 48:1	C14:0_C16:0_C18:1	822.759	M_P_O	2.765	0.138	0.548	5.638	2.851	0.103	1.227	4.707	3.026	0.219	0.7	6.886	2.408	0.1	1.033	4.842	2.925	0.127	0	5.852
TAG 48:1	C12:0_C18:0_C18:1	822.759	La_S_O	ND	ND	ND	ND	ND	ND	ND	ND	0.68	0.049	0.157	1.548	0.541	0.023	0.232	1.088	0.658	0.029	0	1.315
TAG 48:2	C12:0_C18:1_C18:1	820.745	La_O_O	1.959	0.138	0	4.972	3.735	0.113	1.17	5.816	2.553	0.11	0.962	4.45	3.7	0.119	1.581	5.871	4.059	0.145	0	6.427
TAG 48:3	C12:0_C18:1_C18:2	818.728	La_O_L	0.76	0.086	0	3.542	2.418	0.095	0.6	4.391	2.095	0.106	0.606	4.008	2.869	0.095	1.326	4.617	2.507	0.113	0	4.086
TAG 48:4	C12:0_C18:2_C18:2	816.715	La_L_L	0.129	0.031	0	1.454	0.546	0.043	0.143	2.117	0.587	0.053	0.122	2.717	0.812	0.043	0.265	1.968	0.623	0.042	0	1.596
TAG 48:4	C12:0_C18:1_C18:3	816.715	La_O_Ln	ND	ND	ND	ND	0.12	0.009	0.031	0.464	0.021	0.002	0.004	0.098	0.029	0.002	0.01	0.071	0.022	0.002	0	0.057
TAG 48:5	C12:0_C18:2_C18:3	814.699	La_L_Ln	0.003	0.003	0	0.142	0.029	0.008	0	0.341	0.038	0.01	0	0.448	0.055	0.006	0	0.241	0.038	0.005	0	0.178
TAG 50:0	C16:0_C16:0_C18:0	852.804	P_P_S	0.724	0.147	0	8.098	0.386	0.022	0.043	0.787	1.081	0.115	0.075	3.951	0.496	0.029	0.159	1.274	0.642	0.041	0	2.286
TAG 50:1	C16:0_C16:0_C18:1	850.791	P_P_O	6.727	0.21	0.545	9.914	4.293	0.126	1.857	6.472	4.365	0.178	1.019	8.046	4.36	0.138	2.656	8.172	5.262	0.196	1.191	8.773
TAG 50:2	C14:0_C18:1_C18:1	848.776	M_O_O	1.928	0.042	1.025	2.623	3.906	0.08	2.756	5.451	2.22	0.165	0.561	5.405	0.605	0.086	0	1.868	ND	ND	ND	ND
TAG 50:2	C16:0_C16:0_C18:2	848.776	P_P_L	2.67	0.058	1.42	3.633	1.951	0.04	1.377	2.724	4.237	0.315	1.071	10.315	1.154	0.163	0	3.565	ND	ND	ND	ND
TAG 50:2	C16:0_C16:1_C18:1	848.776	P_Po_O	1.803	0.039	0.959	2.454	ND	ND	ND	ND	3.26	0.243	0.824	7.938	0.888	0.126	0	2.743	ND	ND	ND	ND
TAG 50:3	C14:0_C18:1_C18:2	846.76	M_O_L	1.76	0.086	0	3.701	2.035	0.055	1.09	2.819	1.755	0.047	0.971	2.593	2.362	0.05	1.347	3.255	2.345	0.068	0.991	3.689
TAG 50:3	C16:1_C16:1_C18:1	846.76	Po_Po_O	0.26	0.013	0	0.547	0.21	0.006	0.113	0.291	0.495	0.013	0.274	0.732	0.666	0.014	0.38	0.918	0.662	0.019	0.28	1.041
TAG 50:3	C16:0_C16:1_C18:2	846.76	P_Po_L	0.45	0.022	0	0.945	0.828	0.022	0.444	1.147	0.522	0.014	0.289	0.771	0.702	0.015	0.401	0.968	0.698	0.02	0.295	1.097
TAG 50:4	C14:0_C18:2_C18:2	844.746	M_L_L	0.314	0.036	0	1.397	0.552	0.036	0.199	1.911	0.457	0.027	0.185	1.586	0.707	0.029	0.348	1.279	0.65	0.039	0	1.7
TAG 50:4	C14:0_C18:1_C18:3	844.746	M_O_Ln	0.083	0.01	0	0.37	0.142	0.009	0.051	0.493	0.13	0.008	0.053	0.45	0.201	0.008	0.099	0.363	0.184	0.011	0	0.482
TAG 50:5	C14:0_C18:2_C18:3	842.729	M_L_Ln	0.006	0.003	0	0.102	0.042	0.009	0	0.352	0.024	0.005	0	0.221	0.041	0.004	0	0.178	0.037	0.004	0	0.146
TAG 50:5	C12:0_C18:2_C20:3	842.729	La_L_Et	0.005	0.002	0	0.091	ND	ND	ND	ND	0.011	0.002	0	0.104	0.019	0.002	0	0.084	0.017	0.002	0	0.069
TAG 51:1	C16:0_C17:0_C18:1	864.804	P_Ha_O	0.087	0.01	0	0.31	0.082	0.005	0	0.181	0.092	0.007	0	0.225	0.071	0.005	0.017	0.21	0.112	0.006	0	0.225
TAG 51:2	C15:0_C18:1_C18:1	862.79	Pa_O_O	0.1	0.013	0	0.384	0.128	0.009	0.043	0.298	0.2	0.013	0	0.565	0.212	0.012	0.045	0.595	0.259	0.018	0	0.838
TAG 51:3	C15:0_C18:1_C18:2	860.777	Pa_O_L	0.019	0.004	0	0.146	0.04	0.004	0	0.129	0.069	0.004	0	0.198	0.076	0.004	0.011	0.206	0.075	0.005	0	0.202
TAG 51:3	C16:0_C17:1_C18:2	860.777	P_He_L	0.008	0.002	0	0.058	0.018	0.002	0	0.056	0.017	0.001	0	0.049	0.019	0.001	0.003	0.051	0.018	0.001	0	0.05
TAG 51:3	C17:1_C17:1_C17:1	860.777	He_He_He	ND	ND	ND	ND	0.002	0	0	0.007	0.003	0	0	0.008	0.003	0	0	0.009	0.003	0	0	0.009
TAG 52:0	C16:0_C18:0_C18:0	880.838	P_S_S	0.222	0.026	0	1.032	0.189	0.016	0	0.602	0.28	0.023	0	1.101	0.262	0.017	0.071	0.854	0.337	0.021	0	0.917
TAG 52:1	C16:0_C18:0_C18:1	878.82	P_S_O	5.35	0.403	0.293	23.595	3.81	0.183	1.542	8.241	3.125	0.393	0	10.957	4.955	0.136	3.014	7.422	5.784	0.206	2.802	12.098
TAG 52:2	C16:0_C18:1_C18:1	876.807	P_O_O	21.841	0.683	6.488	30.731	15.789	0.477	7.638	23.966	14.895	0.414	7.524	21.327	12.666	0.272	7.868	17.494	14.074	0.489	8.477	33.266
TAG 52:2	C16:0_C18:0_C18:2	876.807	P_S_L	ND	ND	ND	ND	ND	ND	ND	ND	4.271	0.119	2.157	6.116	3.632	0.078	2.256	5.016	4.036	0.14	2.431	9.539
TAG 52:3	C16:0_C18:1_C18:2	874.791	P_O_L	17.113	0.527	4.564	29.333	14.353	0.416	7.393	20.535	12.914	0.822	2.286	23.654	14.208	0.34	8.348	20.057	14.649	0.42	8.678	25.734
TAG 52:4	C16:1_C18:1_C18:2	872.779	Po_O_L	0.664	0.04	0	2.243	0.707	0.026	0.375	1.153	1.09	0.128	0	2.713	0.008	0.001	0	0.026	0.012	0.001	0	0.021
TAG 52:4	C16:0_C18:2_C18:2	872.779	P_L_L	3.854	0.231	0	13.015	4.493	0.163	2.383	7.328	1.329	0.157	0	3.307	0.01	0.001	0	0.031	0.015	0.001	0	0.025
TAG 52:4	C16:0_C18:1_C18:3	872.779	P_O_Ln	ND	ND	ND	ND	ND	ND	ND	ND	1.069	0.126	0	2.66	0.008	0.001	0	0.025	0.012	0.001	0	0.02
TAG 52:5	C16:1_C18:2_C18:2	870.754	Po_L_L	0.182	0.034	0	1.101	0.371	0.038	0	1.433	0.145	0.008	0.042	0.417	0.163	0.01	0.035	0.537	0.166	0.01	0	0.393
TAG 52:5	C16:0_C18:2_C18:3	870.754	P_L_Ln	0.108	0.034	0	1.768	0.185	0.02	0	0.636	0.187	0.011	0.054	0.537	0.209	0.012	0.045	0.691	0.214	0.013	0	0.506
TAG 52:6	C16:1_C18:2_C18:3	868.747	Po_L_Ln	0.001	0.001	0	0.053	0.004	0.002	0	0.073	0.004	0.002	0	0.092	0.002	0.001	0	0.032	0.001	0.001	0	0.022
TAG 53:2	C17:0_C18:1_C18:1	890.821	Ha_O_O	0.154	0.058	0	3.153	0.093	0.004	0	0.175	2.638	0.306	0.448	7.826	0.425	0.037	0.045	0.941	0.759	0.027	0	1.314
TAG 53:3	C17:0_C18:1_C18:2	888.806	Ha_O_L	0.069	0.009	0	0.267	0.108	0.009	0	0.402	0.16	0.009	0.049	0.345	0.168	0.007	0.067	0.306	0.156	0.01	0	0.351
TAG 53:4	C17:0_C18:1_C18:3	886.787	Ha_O_Ln	ND	ND	ND	ND	ND	ND	ND	ND	0.043	0.005	0	0.168	0.05	0.004	0	0.123	0.034	0.005	0	0.144
TAG 54:1	C18:0_C18:0_C18:1	906.856	S_S_O	0.265	0.027	0	1.016	0.117	0.008	0.02	0.326	0.106	0.005	0.028	0.269	0.105	0.006	0.033	0.272	0.124	0.006	0	0.256
TAG 54:1	C16:0_C18:1_C20:0	906.856	P_O_E	ND	ND	ND	ND	0.07	0.005	0.012	0.194	0.076	0.004	0.02	0.193	0.075	0.004	0.023	0.195	0.089	0.004	0	0.183
TAG 54:1	C16:0_C18:0_C20:1	906.856	P_S_Eo	ND	ND	ND	ND	ND	ND	ND	ND	0.092	0.005	0.024	0.233	0.091	0.005	0.028	0.235	0.107	0.005	0	0.221
TAG 54:2	C18:0_C18:1_C18:1	904.834	S_O_O	1.529	0.206	0	6.663	ND	ND	ND	ND	0.012	0.002	0	0.041	0.817	0.126	0	3.8	0.02	0.001	0	0.042
TAG 54:2	C18:0_C18:0_C18:2	904.834	S_S_L	ND	ND	ND	ND	0.786	0.096	0	2.497	0.983	0.117	0	2.609	0.979	0.116	0	2.765	1.901	0.095	0.794	6.107
TAG 54:3	C18:1_C18:1_C18:1	902.822	O_O_O	4.667	0.168	2.407	7.457	4.03	0.176	2.229	8.165	1.988	0.228	0	5.346	3.277	0.103	0.663	5.114	3.263	0.112	1.457	5.675
TAG 54:3	C18:0_C18:1_C18:2	902.822	S_O_L	1.861	0.067	0.96	2.974	ND	ND	ND	ND	1.083	0.124	0	2.912	1.785	0.056	0.361	2.785	1.777	0.061	0.794	3.091
TAG 54:4	C18:1_C18:1_C18:2	900.807	O_O_L	7.628	0.233	3.008	13.142	5.506	0.174	3.065	8.955	0.038	0.007	0	0.195	5.707	0.181	1.077	8.472	5.276	0.191	2.388	9.243
TAG 54:4	C18:0_C18:2_C18:2	900.807	S_L_L	ND	ND	ND	ND	0.191	0.006	0.106	0.31	0.008	0.002	0	0.041	1.205	0.038	0.227	1.788	1.114	0.04	0.504	1.951
TAG 54:5	C18:1_C18:2_C18:2	898.789	O_L_L	3.413	0.194	0	9.566	3.742	0.184	1.51	7.952	5.121	0.346	1.613	15.912	5.457	0.216	1.228	8.534	4.385	0.229	0	9.133
TAG 54:5	C18:1_C18:1_C18:3	898.789	O_O_Ln	0.32	0.025	0	0.871	ND	ND	ND	ND	ND	ND	ND	ND	ND	ND	ND	ND	ND	ND	ND	ND
TAG 54:6	C18:2_C18:2_C18:2	896.772	L_L_L	0.57	0.073	0	3.211	0.855	0.088	0.284	3.955	0.882	0.104	0.183	4.172	1.03	0.066	0.221	2.857	0.802	0.063	0.189	2.926
TAG 54:6	C18:1_C18:2_C18:3	896.772	O_L_Ln	0.059	0.01	0	0.333	0.078	0.008	0	0.238	0.528	0.062	0.109	2.499	0.617	0.04	0.132	1.712	0.481	0.038	0.113	1.753
TAG 54:7	C18:2_C18:2_C18:3	894.757	L_L_Ln	0.011	0.004	0	0.203	0.063	0.013	0	0.495	0.136	0.038	0	1.417	0.147	0.015	0	0.729	0.11	0.015	0	0.715
TAG 56:1	C16:0_C18:1_C22:0	934.887	P_O_Do	ND	ND	ND	ND	ND	ND	ND	ND	0.055	0.007	0	0.198	0.052	0.007	0	0.206	0.055	0.006	0	0.174
TAG 56:2	C16:0_C18:1_C22:1	932.866	P_O_Da	0.206	0.019	0	0.479	0.062	0.008	0	0.422	0.093	0.008	0	0.337	0.07	0.014	0	0.893	0.062	0.005	0	0.142
TAG 56:2	C16:0_C20:1_C20:1	932.866	P_Eo_Eo	ND	ND	ND	ND	0.021	0.003	0	0.141	0.025	0.002	0	0.092	0.019	0.004	0	0.244	0.017	0.001	0	0.039
TAG 56:3	C18:1_C18:2_C20:0	930.855	O_L_E	0.381	0.033	0	0.915	0.129	0.016	0	0.816	0.318	0.035	0	1.079	0.113	0.011	0	0.494	0.134	0.01	0	0.341
TAG 56:4	C18:0_C18:1_C20:3	928.84	S_O_Et	0.506	0.039	0	1.161	0.161	0.016	0	0.879	0.17	0.015	0.026	0.829	0.136	0.009	0	0.432	0.126	0.009	0	0.332
TAG 56:5	C16:0_C18:1_C22:4	926.822	P_O_De	0.16	0.019	0	0.644	0.017	0.003	0	0.092	0.034	0.004	0	0.186	0.022	0.002	0	0.085	0.019	0.002	0	0.062
TAG 56:6	C18:1_C18:1_C20:4	924.802	O_O_ARA	0.107	0.013	0	0.383	ND	ND	ND	ND	0.323	0.047	0.02	1.767	0.091	0.006	0	0.258	0.085	0.007	0	0.222
TAG 56:6	C16:0_C18:1_C22:5	924.802	P_O_DPA	0.1	0.012	0	0.358	0.091	0.009	0	0.271	ND	ND	ND	ND	ND	ND	ND	ND	ND	ND	ND	ND
TAG 56:7	C16:0_C18:1_C22:6	922.779	P_O_DHA	0.081	0.015	0	0.594	0.057	0.007	0	0.238	0.088	0.011	0	0.415	0.073	0.008	0	0.303	0.067	0.008	0	0.323
TAG 56:7	C18:1_C18:2_C20:4	922.779	O_L_ARA	0.048	0.009	0	0.355	0.027	0.003	0	0.111	0.028	0.004	0	0.132	0.023	0.003	0	0.096	0.021	0.003	0	0.103
TAG 58:2	C16:0_C18:1_C24:1	960.894	P_O_T	0.122	0.014	0	0.352	0.016	0.005	0	0.225	0.018	0.004	0	0.183	0.015	0.006	0	0.386	0.011	0.002	0	0.053
TAG 58:8	C18:1_C18:1_C22:6	948.799	O_O_DHA	0.073	0.015	0	0.569	0.056	0.008	0	0.308	0.057	0.009	0	0.334	0.047	0.006	0	0.195	0.037	0.005	0	0.158
TAG 58:9	C18:1_C18:2_C22:6	946.635	O_L_DHA	0.03	0.006	0	0.123	0.036	0.006	0	0.191	2.647	0.347	0.304	8.419	0.252	0.023	0	0.526	0.389	0.011	0	0.529
ARA: arachidonic acid; Bu: butyric acid; Ca: capric acid; Co: caproic acid; Cy: caprylic acid; Da: docosenoic acid; De: docosatetraenoic acid; DHA: decosahexaenoic acid; Do: docosanoic acid; DPA: Docosapentaenoic acid; E: eicosanoic acid; Eo: eicosenoic acid; Et: eicosaptrienoic acid; Ha: heptadecanoic acid; He: heptadecenoic acid; L: linoleic acid; La: lauric acid; Ln: linolenic acid; M: myristi…
